# Supplementary material
Source: PubMed Central journal article supplement (PMC5096803)
Supplement: jci-126-81568-s001.pdf [file jci-126-81568-s001.pdf]

## **Targeting mitochondrial translation in RB1-deficient triple-negative breast cancer**

Robert A. Jones<sup>1, §</sup>, Tyler J. Robinson<sup>1, §</sup>, Jeff C. Liu<sup>1, §</sup>, Mariusz Shrestha<sup>1,2, §</sup>, Veronique Voisin<sup>3, §</sup>, YoungJun Ju<sup>1</sup>, Philip E.D. Chung<sup>1,2</sup>, Giovanna Pellecchia<sup>2</sup>, Victoria L. Fell<sup>1</sup>, SooIn Bae<sup>4</sup>, Lakshmi Muthuswamy<sup>5</sup>, Alessandro Datti<sup>6,7</sup>, Sean E. Egan<sup>8,9</sup>, Zhe Jiang<sup>1</sup>, Gustavo Leone<sup>4</sup>, Gary D. Bader<sup>3,9</sup>, Aaron Schimmer<sup>10</sup> and Eldad Zacksenhaus<sup>1,2,11\*</sup>

**SUPPLEMENTARY TABLES S1-S2 and FIGURES S1-S14**

**Supplemental Table S1.** Chromatin-immunoprecipitation (ChIP) data on E2F1 recruitment to MPT and cell cycle promoters in MCF10A and MCF7 cells

| ChIP-Seq (MCF7) |       |       |         | ChIP-Chip (MCF7, MCF10A) |         |      |        |        |
|-----------------|-------|-------|---------|--------------------------|---------|------|--------|--------|
| Gene            | Chrom | Peaks | Encode  | Peaks Range              | Ave ePV | MCF7 | MCF10A | *500bp |
| SFXN1           | chr5  | 169   | 169.149 | (-165) -- (30)           | 0.02734 | +    | -      | Yes    |
| SFXN2           | chr10 | -43   | 165.207 | (-257) -- (445)          | 0.01818 | +    | +      | Yes    |
| SMAD3           | chr15 | 307   | 128.485 | (-1258) -- (-1113)       | 0.03377 | +    | -      | No     |
| MRPL37          | chr1  | -99   | 126.794 | (-475) -- (340)          | 0.00976 | +    | +      | Yes    |
| TTC19           | chr17 | 143   | 100.876 | (18)                     | 0.00800 | -    | +      | Yes    |
| HTRA2           | chr2  | 200   | 99.748  | (-382) -- (491)          | 0.02122 | +    | +      | Yes    |
| PARK7           | chr1  | -12   | 79.489  | (-239) -- (-144)         | 0.02434 | +    | +      | Yes    |
| NSUN4           | chr1  | -342  | 77.904  | (551)                    | 0.00050 | +    | +      | No     |
| MRPL40          | chr22 | -151  | 76.814  | (233) -- (478)           | 0.02894 | +    | +      | Yes    |
| CISD1           | chr10 | -460  | 57.495  | (-523) -- (-143)         | 0.01591 | +    | +      | Yes    |
| ETFDH           | chr4  | -379  | 54.638  | (-233) -- (-193)         | 0.01237 | +    | +      | Yes    |
| MPV17           | chr2  | 79    | 51.905  | (-248) -- (-173)         | 0.02611 | +    | +      | Yes    |
| PHB2            | chr12 | 95    | 39.419  | (-385) -- (116)          | 0.02034 | +    | +      | Yes    |
| DUSP18          | chr22 | -155  | 38.338  | (-241) -- (-36)          | 0.00849 | +    | -      | Yes    |
| HIGD2A          | chr5  | 70    | 36.271  | (-399) -- (224)          | 0.00360 | +    | +      | Yes    |
| NDUFAB1         | chr16 | 295   | 29.171  | (-13) -- (127)           | 0.02427 | +    | +      | Yes    |
| TOMM40          | chr19 | -216  | 27.798  | (-645) -- (-525)         | 0.00360 | +    | +      | Yes    |
| ATP5D           | chr19 | -27   | 25.273  | (-220) -- (-100)         | 0.01764 | +    | +      | Yes    |
| MRPL43          | chr10 | 165   | 15.703  | (-206) -- (224)          | 0.01452 | +    | +      | Yes    |
| DHFR            | chr5  | 350   | 4.057   | (-605) -- (-415)         | 0.02249 | +    | +      | No     |
| TK1             | chr17 | 39    | 12.113  | (-688) -- (-188)         | 0.00985 | +    | +      | Yes    |
| POLA1           | chrX  | -93   | 29.955  | (-610) -- (-325)         | 0.00718 | +    | +      | Yes    |
| CCNE1           | chr19 | 128   | 73.359  | (-954)                   | 0.01000 | +    | -      | No     |
| CDK1            | chr10 | -695  | 12.265  | (-551) -- (-136)         | 0.01133 | +    | +      | Yes    |
| ALB             | chr4  | NA    | NA      | NA                       | NA      | NA   | NA     | NA     |

\* Peaks detected by ChIP-Seq and ChIP-Chip are within 500 bp of each other

**Supplemental Table S2.** Correlation analysis of RB, E2F1 and E2F3 expression with those of indicated MPT vs known E2F-regulated cell cycle genes. Albumin was used as negative ctrl.

|                | <b>RB</b>       | <b>E2F1</b>    | <b>E2F3</b>     |
|----------------|-----------------|----------------|-----------------|
| <b>atp5d</b>   | <b>-0.11***</b> | <b>0.06**</b>  | 0.01            |
| <b>cisd1</b>   | 0               | <b>0.10***</b> | <b>0.08***</b>  |
| <b>mprl37</b>  | <b>-0.22***</b> | <b>0.28***</b> | <b>0.21***</b>  |
| <b>ndufab1</b> | <b>-0.04*</b>   | <b>0.06**</b>  | -0.11           |
| <b>nsun4</b>   | <b>-0.18***</b> | <b>0.17***</b> | <b>0.14***</b>  |
| <b>phb2</b>    | <b>-0.20***</b> | <b>0.04*</b>   | <b>0.16***</b>  |
| <b>sfxn1</b>   | -0.01           | <b>0.05*</b>   | -0.02           |
| <b>smad3</b>   | -0.03           | <b>0.18***</b> | <b>0.05*</b>    |
| <b>tomm40</b>  | <b>-0.26***</b> | <b>0.20***</b> | <b>0.37***</b>  |
| <b>dhfr</b>    | -0.04           | <b>0.08***</b> | <b>0.13***</b>  |
| <b>tk1</b>     | <b>-0.17***</b> | <b>0.22***</b> | <b>0.21***</b>  |
| <b>Pola1</b>   | <b>-0.13***</b> | <b>0.12***</b> | <b>0.09***</b>  |
| <b>Ccne1</b>   | <b>-0.17***</b> | <b>0.20***</b> | <b>0.35***</b>  |
| <b>cdc2</b>    | -0.02           | <b>0.13***</b> | <b>0.17***</b>  |
| <b>alb</b>     | 0.03            | 0.01           | <b>-0.10***</b> |

**+ve / -ve** Correlation

\*p < 0.05; \*\*p < 0.005; \*\*\*p < 0.0005

| <b>MFS</b> | <b>#Basal Patient</b> | <b>Treatment</b>                     |
|------------|-----------------------|--------------------------------------|
| GSE2034    | 52                    | Radiotherapy                         |
| GSE2603    | 22                    | Radiotherapy                         |
| GSE5327    | 35                    | <unknown>                            |
| GSE6532    | 18                    | Tamoxifen                            |
| GSE11121   | 25                    | Radiotherapy                         |
| GSE25066   | 189                   | taxane-anthracycline<br>chemotherapy |

**Figure S1.** Cohorts with Metastasis Free Survival (MFS) and RNA expression data used for bioinformatic analysis. These breast cancer datasets were combined for the bioinformatic analysis shown in Fig 1. Treatment and number of basal-like patients in each cohort (based on PAM50 classification) are indicated.

**A**

| <b>Tumor Model</b>                                                | <b>Mammary Tumor Incidence</b>                  | <b>Median Tumor Onset</b> |
|-------------------------------------------------------------------|-------------------------------------------------|---------------------------|
| MMTV <i>cre</i> :Rb <sup>ff</sup> :p53 <sup>ff</sup> (Transplant) | 6/8 donors (75%)<br>19/26 transplants (73%)     | 275                       |
| MMTV <i>cre</i> :Rb <sup>ff</sup> :p53 <sup>ff</sup>              | 16/21 (76%)                                     | 453                       |
| Ad-CMV <i>cre</i> :Rb <sup>ff</sup> :p53 <sup>ff</sup>            | 3/3 experiments (100%)<br>6/9 transplants (67%) | 261                       |
| MMTV <i>cre</i> :Rb <sup>ff</sup> :p53 <sup>LSLR270H/+</sup>      | 5/10 (50%)                                      | 429                       |

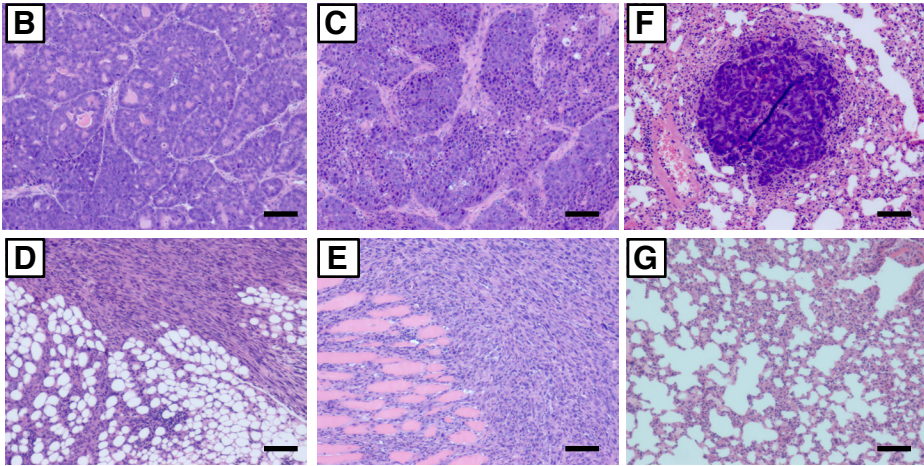

**WAP*cre*;Rb<sup>ff</sup>;p53<sup>ff</sup>**

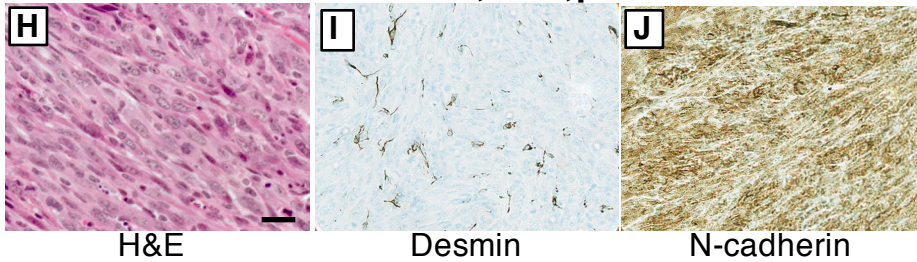

**Figure S2. Disruption of Rb and p53 in mammary epithelium via MMTV-cre or WAP-Cre induces spindle-cell tumors.** (A) Incidence and onset of mammary tumor formation in indicated models following disruption of Rb and p53 in mammary epithelia. (B-C, F) Histology of rare solid mammary tumors that developed in two MMTV $cre$ ;Rb $^{fl/fl}$ ;p53 $^{fl/fl}$  mice and a corresponding lung metastases (F) from (B). (D-E, G) Locally invasive spindle cell tumors without lung metastases (G) from MMTV $cre$ ;Rb $^{fl/fl}$ ;p53 $^{fl/fl}$  mice. (H-J) Histology and expression of the mesenchymal markers desmin and N-cadherin in a spindle-cell tumor from WAP $cre$ ;Rb $^{fl/fl}$ ;p53 $^{fl/fl}$  mice. Scale bars in B-G, 200 $\mu$ m; H, 50 $\mu$ m.

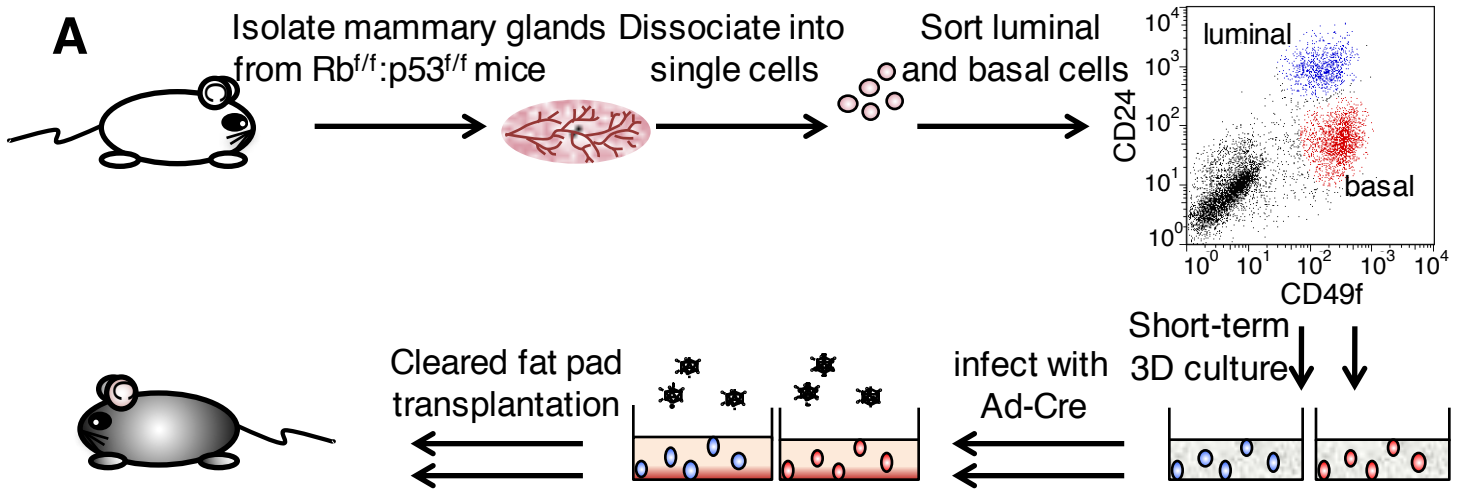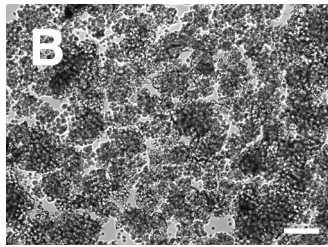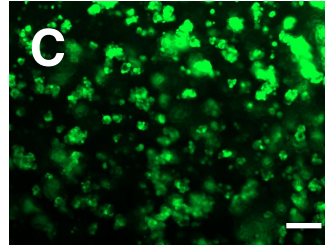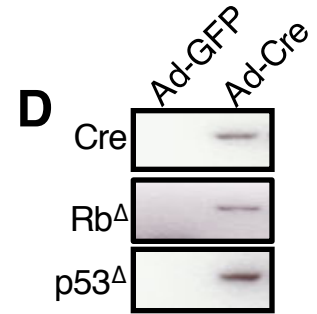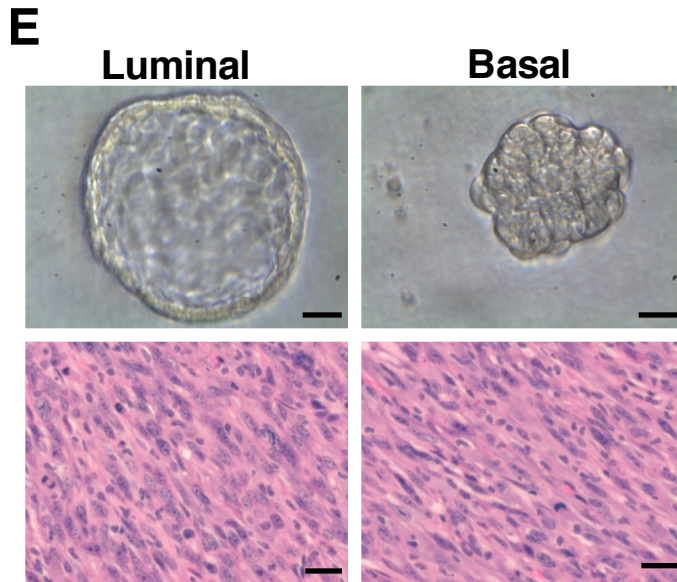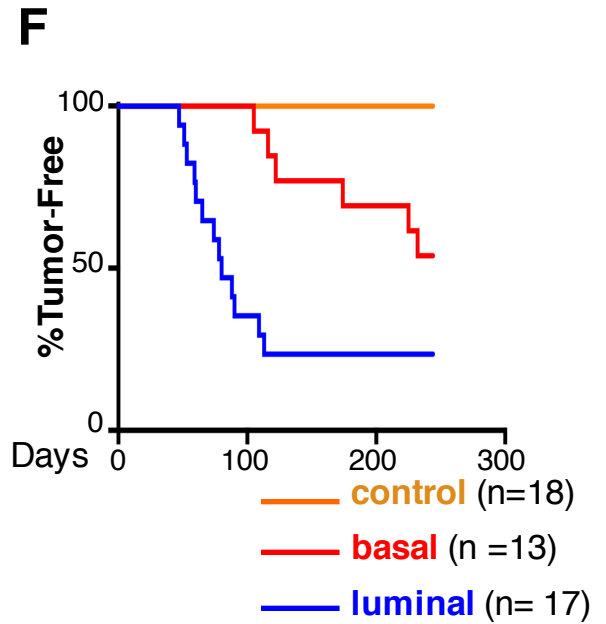

**G**

| Experiment            | #Tumors/#Mice |            |         |
|-----------------------|---------------|------------|---------|
|                       | Luminal       | Basal      | Control |
| with support cells    | 1   5/5       | 3/5        | 0/3     |
|                       | 2   2/3       | 1/3        | 0/3     |
|                       | 3   3/3       | 1/3        | 0/3     |
| without support cells | 4   1/2       | 1/2        | N/A     |
|                       | 5   2/4       | N/A        | N/A     |
| total                 | 13/17 (76%)   | 6/13 (46%) | 0/9     |

**Supplemental Figure S3**



**Figure S3. Disruption of Rb and p53 in enriched populations of either luminal or basal progenitors induce spindle-tumors.** (A) Schematic of the experimental protocol used to delete Rb and p53 in luminal or basal progenitors. Primary mammary epithelial cells (MECs) were isolated from Rb<sup>f/f</sup>;p53<sup>f/f</sup> mice and sorted into luminal and basal cell populations using fluorescent activated cell sorting (FACS). Sorted cells were then cultured in 3D to allow formation of sphere-like organoids. After 5-8 days, organoids were dissociated into single cells, infected with Ad-cre-GFP and transplanted into cleared fat pads of immune-deficient mice. (B-D) *Ex vivo* deletion of Rb and p53. Brightfield (B) and GFP fluorescent (C) photomicrographs of Ad-cre-GFP infected primary Rb<sup>f/f</sup>;p53<sup>f/f</sup> mammary epithelial cells cultured under non-adherent conditions. Scale bars 100µm. (D) PCR analysis for Rb and p53 recombination 72hrs post infection with Ad-cre-GFP or Ad-GFP. (E) **Top**, photomicrographs showing distinct morphologies of luminal and basal organoids in 3D conditions (scale bars, 20µm). **Bottom**, histology of mammary tumors developed following Ad-cre-GFP mediated deletion of Rb<sup>f/f</sup> and p53<sup>f/f</sup> in luminal or basal progenitors. (F) Kaplan-Meier mammary tumor-free survival curves of mice transplanted with Rb/p53-deficient luminal or basal progenitors (Fisher's exact test, p=0.1322). Ad-GFP infected cells from wild type mice served as controls. (G) Tumor incidence from the Ad-cre-GFP -infected Rb<sup>f/f</sup>;p53<sup>f/f</sup> luminal or basal progenitors.

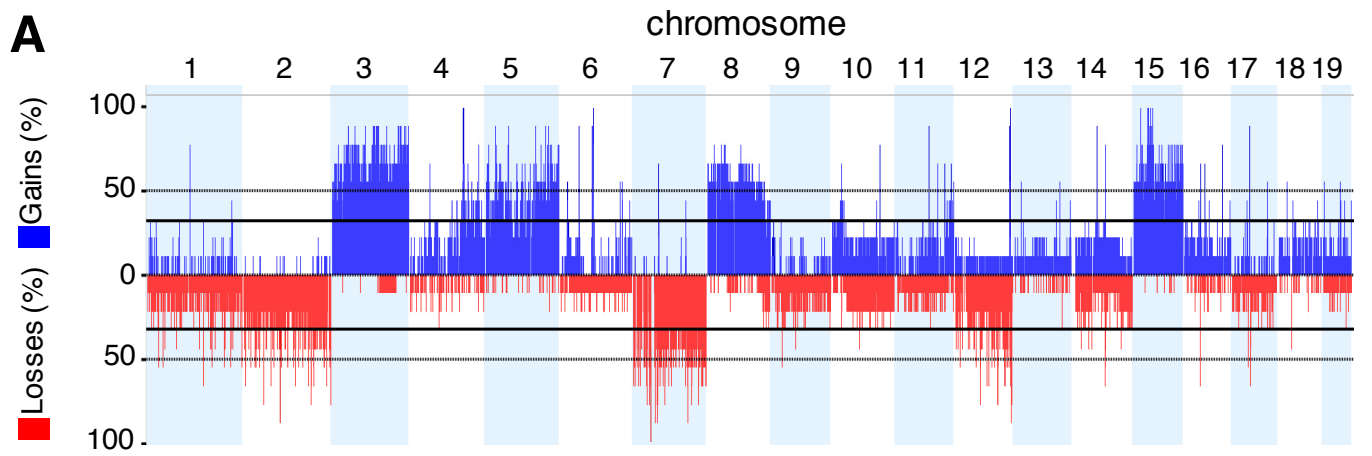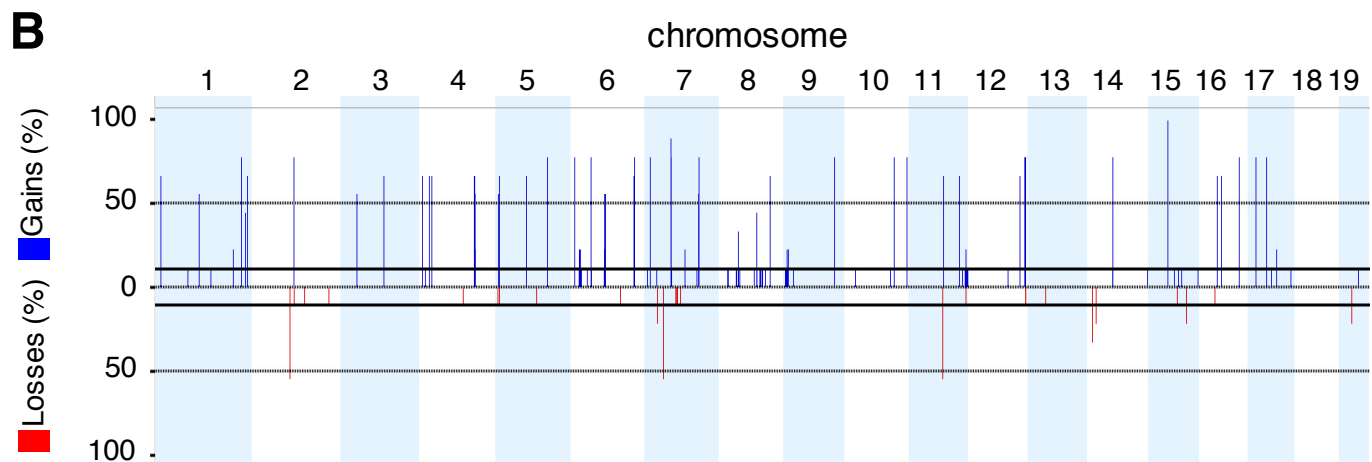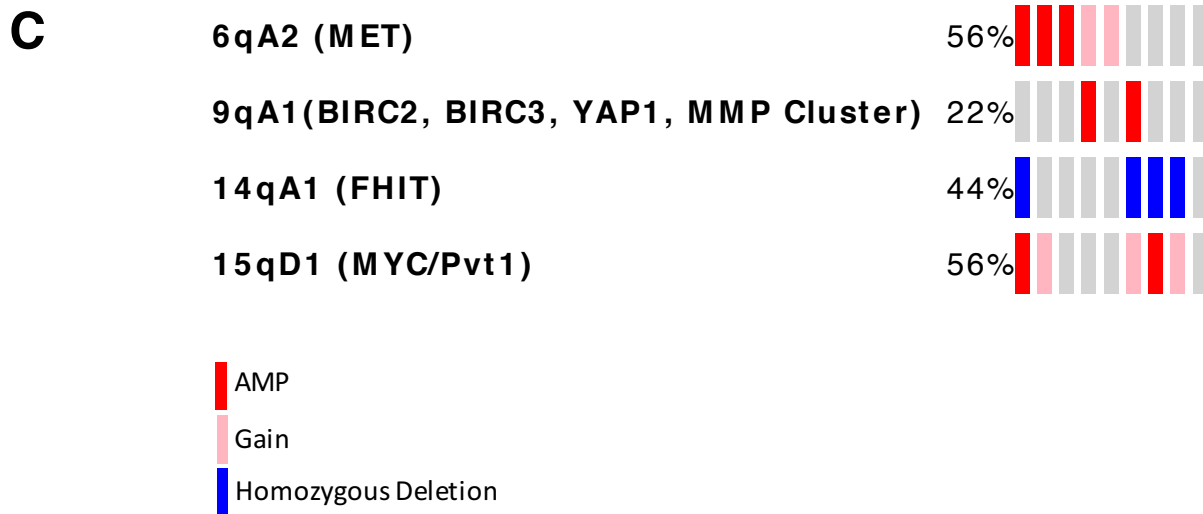

Supplemental Figure S4A-C

## D

| Region                        | Region Length | Cytoband Location | Event   |
|-------------------------------|---------------|-------------------|---------|
| chr1:90,194,440-90,208,356    | 13916         | qD                | CN Gain |
| chr2:77,709,806-77,867,695    | 157889        | qC3               | CN Loss |
| chr4:111,738,147-112,270,058  | 531911        | qD1               | CN Gain |
| chr4:112,468,339-112,481,282  | 12943         | qD1               | CN Gain |
| chr4:112,509,281-113,255,950  | 746669        | qD1               | CN Gain |
| chr4:113,544,283-113,585,504  | 41221         | qD1               | CN Gain |
| chr6:17,054,902-17,711,820    | 656918        | qA2               | CN Gain |
| chr6:17,849,280-18,003,078    | 153798        | qA2               | CN Gain |
| chr6:19,938,904-21,000,795    | 1061891       | qA2               | CN Gain |
| chr6:41,017,660-41,115,088    | 97428         | qB1               | CN Gain |
| chr6:70,448,376-70,628,523    | 180147        | qC1               | CN Gain |
| chr7:26,778,136-26,984,188    | 206052        | qA3               | CN Loss |
| chr7:38,963,263-38,985,946    | 22683         | qB2               | CN Loss |
| chr7:54,893,308-54,997,383    | 104075        | qB4               | CN Gain |
| chr9:6,557,813-8,368,369      | 1810556       | qA1               | CN Gain |
| chr9:9,153,878-9,190,123      | 36245         | qA1               | CN Gain |
| chr10:100,595,649-100,669,755 | 74106         | qD1               | CN Gain |
| chr11:70,982,720-71,111,487   | 128767        | qB4               | CN Gain |
| chr11:103,370,441-103,390,309 | 19868         | qE1               | CN Gain |
| chr11:116,602,137-116,629,157 | 27020         | qE2               | CN Gain |
| chr12:114,835,050-114,971,111 | 136061        | qF1               | CN Gain |
| chr12:115,303,388-115,378,652 | 75264         | qF1               | CN Gain |
| chr12:115,864,896-116,024,653 | 159757        | qF2               | CN Gain |
| chr12:116,264,299-116,299,818 | 35519         | qF2               | CN Gain |
| chr14:10,729,542-11,668,820   | 6063          | qA1               | CN Loss |
| chr14:52,575,120-52,593,014   | 17894         | qC2               | CN Gain |
| chr15:61,050,340-62,788,961   | 1738621       | qD1               | CN Gain |
| chr16:36,244,633-36,328,140   | 83507         | qB3               | CN Gain |
| chr16:44,830,484-44,868,563   | 38079         | qB4               | CN Gain |
| chr16:80,943,011-80,972,831   | 29820         | qC3.3             | CN Gain |
| chr17:38,441,884-38,514,425   | 72541         | qB1               | CN Gain |

**Figure S4. Copy number alterations in Rb<sup>ΔΔ</sup>;p53<sup>ΔΔ</sup> claudin-low tumors.** (A-B) Frequency plots of copy number alterations (amplification or homozygous deletion) in Rb<sup>ΔΔ</sup>p53<sup>ΔΔ</sup> mammary tumors at low (A) and high (B) stringency. (C) Oncoprint of copy number changes involving the indicated oncogenes and tumor suppressors. (D) Summary of high-level amplifications and homozygous deletions.

**A**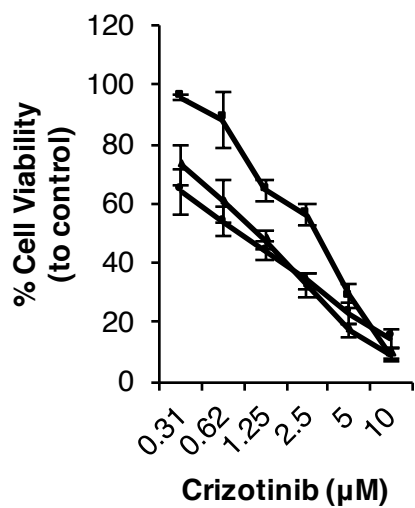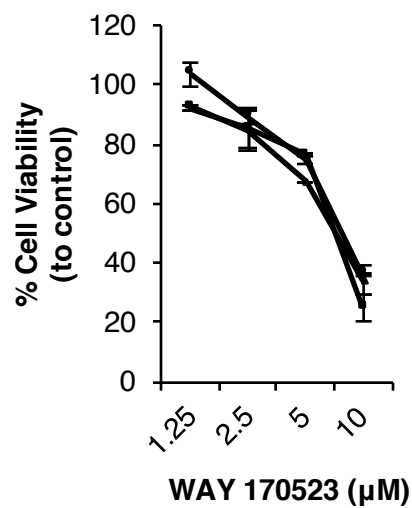**B**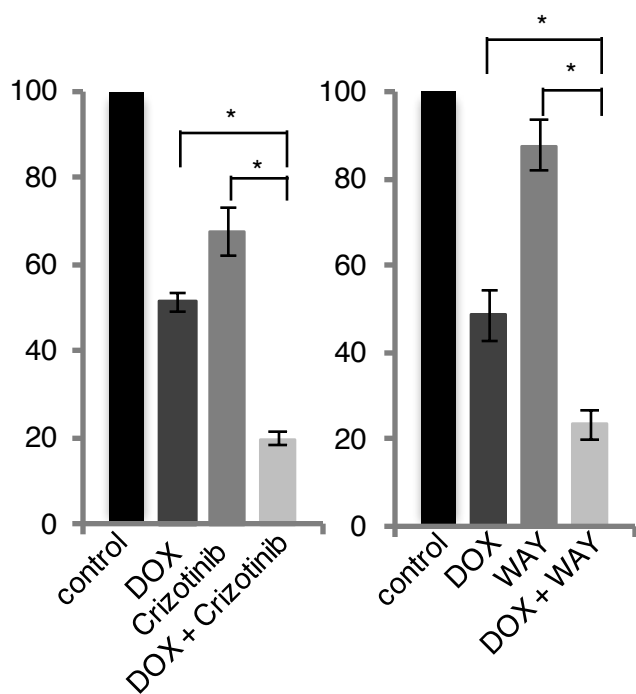**C**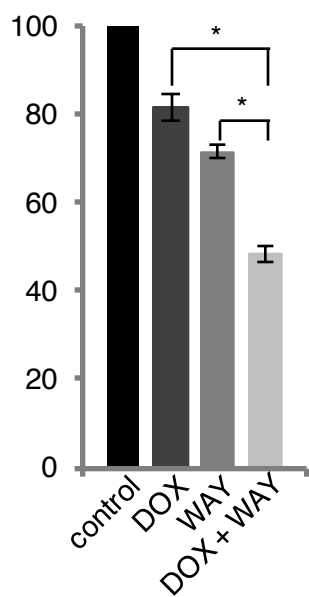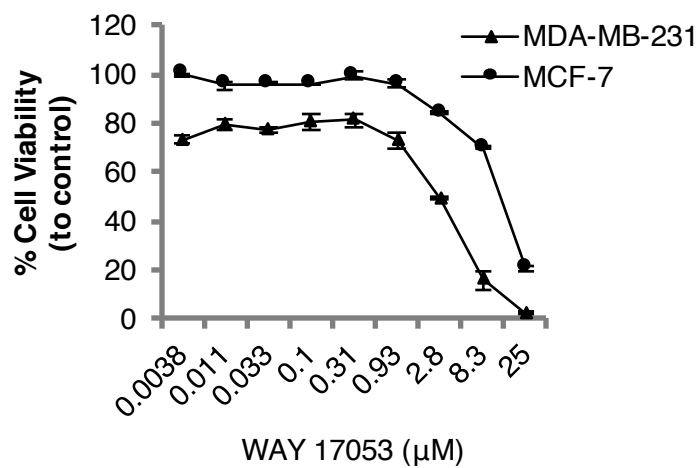

**Figure S5. Effects of drugs that target amplified genes identified by aCGH analysis of Rb<sup>ΔΔ</sup>;p53<sup>ΔΔ</sup> claudin low-like tumors.** (A) Effect of the MET inhibitor crizotinib or the MMP13 inhibitor WAY170523 on Rb<sup>ΔΔ</sup>;p53<sup>ΔΔ</sup> tumor cell viability (line# 1; MTT assay) 72 hr post treatment. (B) Effect of doxorubicin (DOX) alone or in combination with Crizotinib or WAY170523 on Rb<sup>ΔΔ</sup>;p53<sup>ΔΔ</sup> tumor cell viability. (C) Effect of doxorubicin plus WAY170523 on viability of the claudin-low TNBC line, MDA-MB-231, and comparison to sensitivity of the luminal BC line, MCF7, showing increased sensitivity of TNBC cells.

**A**

| Gene ID(s) | Ensembl ID(s)      | Chr | Start     | End       | Strand | Nearest TSS | TFBS Start | TFBS End  | TFBS Rel. Start | TFBS Rel. End | TFBS Strand | Abs. Score | Rel. Score | TFBS Sequence |
|------------|--------------------|-----|-----------|-----------|--------|-------------|------------|-----------|-----------------|---------------|-------------|------------|------------|---------------|
| Etfdh      | ENSMUSG00000027809 | 3   | 79407710  | 79432785  | -      | 79432785    | 79433023   | 79433030  | -245            | -238          | +           | 8.832      | 87.00%     | TTGGGCGC      |
| Htra2      | ENSMUSG00000068329 | 6   | 83001260  | 83005267  | -      | 83005267    | 83006604   | 83006611  | -1344           | -1337         | -           | 9.128      | 88.00%     | TTTGTCGC      |
|            |                    |     |           |           |        | 83005267    | 83007079   | 83007086  | -1819           | -1812         | -           | 8.832      | 87.00%     | TTTGGGGC      |
| Sfxn1      | ENSMUSG00000021474 | 13  | 54167214  | 54203715  | +      | 54167214    | 54167625   | 54167632  | 412             | 419           | -           | 8.329      | 85.30%     | TTGCGCCG      |
| Higd2a     | ENSMUSG00000025868 | 13  | 54691568  | 54692519  | +      | 54691568    | 54691430   | 54691437  | -138            | -131          | -           | 8.329      | 85.30%     | TTGCGCCG      |
| Rab3a      | ENSMUSG00000031840 | 8   | 73278578  | 73282576  | +      | 73278578    | 73277291   | 73277298  | -1287           | -1280         | +           | 8.832      | 87.00%     | ATTGGCGC      |
| Smad3      | ENSMUSG00000032402 | 9   | 63494574  | 63605801  | -      | 63559776    | 63560901   | 63560908  | -1132           | -1125         | -           | 8.832      | 87.00%     | TTTGGGGC      |
|            |                    |     |           |           |        | 63605801    | 63605852   | 63605859  | -58             | -51           | +           | 8.832      | 87.00%     | TTTGTGTC      |
|            |                    |     |           |           |        | 63605801    | 63605988   | 63605995  | -194            | -187          | +           | 8.624      | 86.30%     | TTTCACGC      |
| Mtx1       | ENSMUSG00000064068 | 3   | 89013003  | 89031010  | -      | 89014758    | 89014787   | 89014794  | -36             | -29           | +           | 8.832      | 87.00%     | TTTGGAGC      |
|            |                    |     |           |           |        | 89031010    | 89031210   | 89031217  | -207            | -200          | -           | 8.832      | 87.00%     | TCTGGCGC      |
|            |                    |     |           |           |        | 89031010    | 89031433   | 89031440  | -430            | -423          | +           | 8.832      | 87.00%     | TTTGTGTC      |
| Ndufab1    | ENSMUSG00000030869 | 7   | 129228917 | 129245400 | -      | 129245220   | 129245146  | 129245153 | 68              | 75            | -           | 8.496      | 85.90%     | TTTGCCGG      |
| Mrpl43     | ENSMUSG00000025208 | 19  | 45079504  | 45080932  | -      | 45080932    | 45081394   | 45081401  | -469            | -462          | -           | 8.469      | 85.80%     | TTTCGCGT      |
|            |                    |     |           |           |        | 45080932    | 45081709   | 45081716  | -784            | -777          | +           | 8.832      | 87.00%     | CTTGGCGC      |
|            |                    |     |           |           |        | 45080932    | 45082026   | 45082033  | -1101           | -1094         | -           | 8.832      | 87.00%     | TTTGCCCC      |
|            |                    |     |           |           |        | 45080932    | 45082586   | 45082593  | -1661           | -1654         | -           | 8.329      | 85.30%     | TTTCGAGC      |
| Atp5d      | ENSMUSG00000003072 | 10  | 79601377  | 79608563  | +      | 79601377    | 79601715   | 79601722  | 339             | 346           | -           | 8.329      | 85.30%     | TGTGCGCG      |
| Sfxn2      | ENSMUSG00000025036 | 19  | 46647855  | 46671388  | +      | 46647855    | 46647445   | 46647452  | -410            | -403          | +           | 8.329      | 85.30%     | TTACGCGC      |
|            |                    |     |           |           |        | 46647855    | 46647701   | 46647708  | -154            | -147          | -           | 12.603     | 100.00%    | TTTGGCGC      |
| Nsun4      | ENSMUSG00000028706 | 4   | 115704379 | 115726481 | -      | 115726481   | 115725813  | 115725820 | 662             | 669           | -           | 8.832      | 87.00%     | TGTGCGCG      |
|            |                    |     |           |           |        | 115726481   | 115727690  | 115727697 | -1216           | -1209         | -           | 8.832      | 87.00%     | TTTGGCTC      |
| Nsun4      | ENSMUSG00000090697 | 4   | 115706512 | 115725985 | -      | 115725985   | 115727690  | 115727697 | -1712           | -1705         | -           | 8.832      | 87.00%     | TTTGGCTC      |
| Park7      | ENSMUSG00000028964 | 4   | 150271242 | 150288546 | -      | 150288315   | 150288400  | 150288407 | -92             | -85           | -           | 8.329      | 85.30%     | GTTCCGCG      |
| Armxc3     | ENSMUSG00000049047 | X   | 131291134 | 131295994 | +      | 131291186   | 131291630  | 131291637 | 445             | 452           | -           | 10.444     | 92.60%     | TTTCCCGC      |
| Tom40      | ENSMUSG0000002984  | 7   | 20286662  | 20300787  | -      | 20300787    | 20300802   | 20300809  | -22             | -15           | +           | 10.444     | 92.60%     | TTTCCCGC      |
|            |                    |     |           |           |        | 20300787    | 20301533   | 20301540  | -753            | -746          | +           | 8.832      | 87.00%     | TTTGGCCC      |
| Phb2       | ENSMUSG00000004264 | 6   | 124662340 | 124666968 | +      | 124662340   | 124662161  | 124662168 | -179            | -172          | -           | 8.329      | 85.30%     | TTTCGAGC      |
| Ttc19      | ENSMUSG00000042298 | 11  | 62094975  | 62141953  | +      | 62094975    | 62094760   | 62094767  | -215            | -208          | +           | 8.329      | 85.30%     | TCTGCGCG      |
| Poldip2    | ENSMUSG00000001100 | 11  | 78325695  | 78336238  | +      | 78325695    | 78325569   | 78325576  | -126            | -119          | -           | 8.329      | 85.30%     | GTTCCGCG      |
| Dusp18     | ENSMUSG00000047205 | 11  | 3795243   | 3801299   | +      | 3795243     | 3794364    | 3794371   | -879            | -872          | -           | 8.832      | 87.00%     | TTTGTGTC      |
| Ppp1cc     | ENSMUSG00000004455 | 5   | 122608287 | 122625282 | +      | 122608287   | 122608059  | 122608066 | -228            | -221          | -           | 8.832      | 87.00%     | GTTGCGCG      |
|            |                    |     |           |           |        | 122608287   | 122608114  | 122608121 | -173            | -166          | +           | 10.152     | 91.60%     | TTTGGCGG      |
| Mrpl40     | ENSMUSG00000022706 | 16  | 18872111  | 18876860  | -      | 18876860    | 18877050   | 18877057  | -197            | -190          | -           | 8.329      | 85.30%     | ATTCCGCG      |
|            |                    |     |           |           |        | 18876860    | 18877284   | 18877291  | -431            | -424          | +           | 10.444     | 92.60%     | TTTCCCGC      |
| Mpv17      | ENSMUSG00000090262 | 5   | 31443033  | 31460526  | -      | 31460526    | 31459790   | 31459797  | 730             | 737           | +           | 8.832      | 87.00%     | TTTGGGGC      |
|            |                    |     |           |           |        | 31460526    | 31461820   | 31461827  | -1301           | -1294         | +           | 9.648      | 89.80%     | TTTCGCGG      |
| Cisd1      | ENSMUSG00000037710 | 10  | 70793228  | 70807702  | -      | 70807702    | 70807718   | 70807725  | -23             | -16           | +           | 8.832      | 87.00%     | TTAGGCGC      |
| Slc25a22   | ENSMUSG00000019082 | 7   | 148615638 | 148623791 | -      | 148623791   | 148624691  | 148624698 | -907            | -900          | +           | 8.832      | 87.00%     | TCTGCGCG      |
|            |                    |     |           |           |        | 148623791   | 148625646  | 148625653 | -1862           | -1855         | -           | 8.832      | 87.00%     | TTTGGCCC      |
| Mrpl37     | ENSMUSG00000028622 | 4   | 106728479 | 106739473 | -      | 106737962   | 106738439  | 106738446 | -484            | -477          | +           | 8.832      | 87.00%     | TTTGGCTC      |

**Supplemental Figure S6A**

**B** E2F mediated regulation of DNA replication

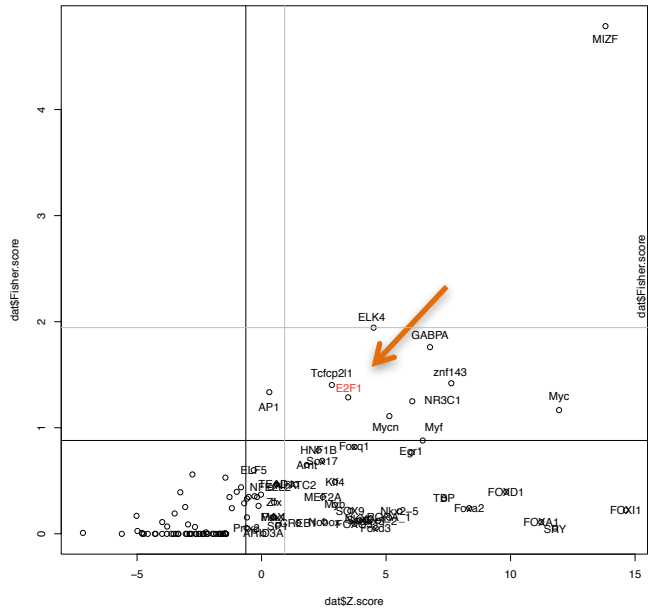

GST transferase

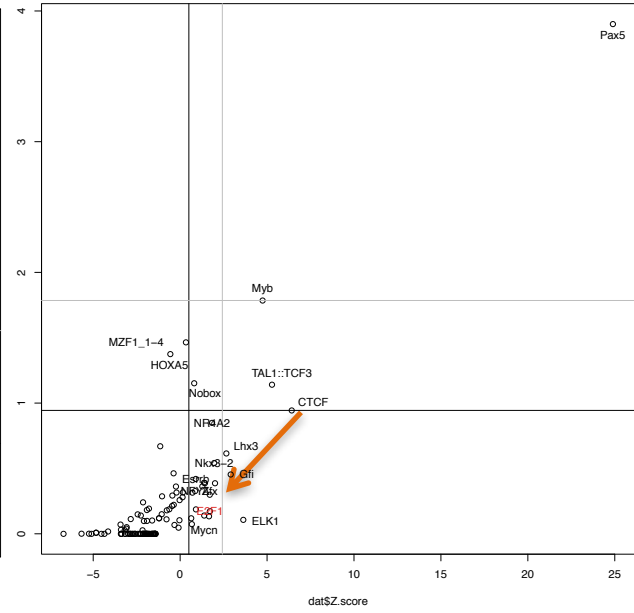

TCA

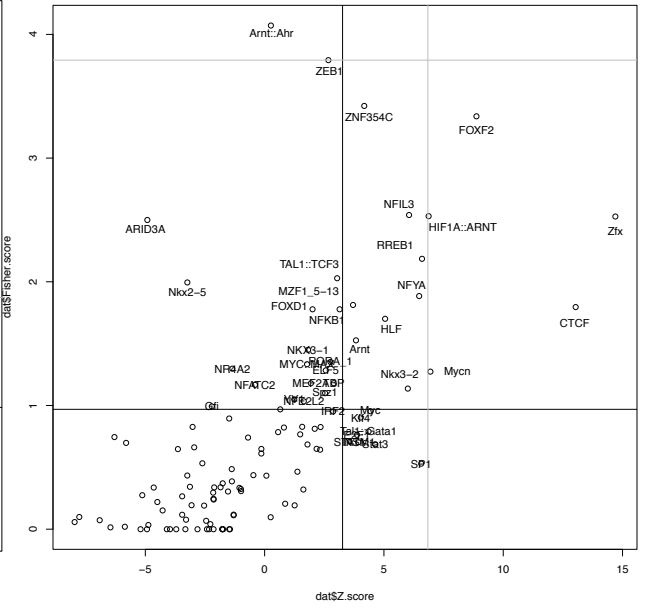



C

# MRPL37

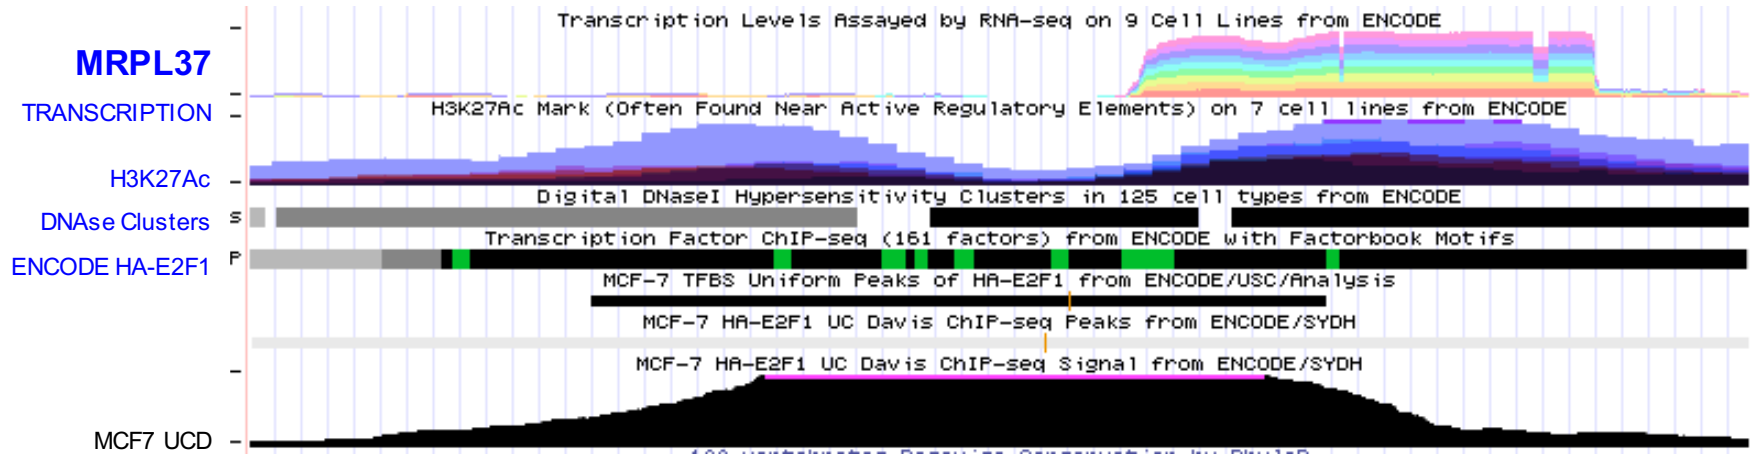

Supplemental Figure S6C

# D

## NSUN4

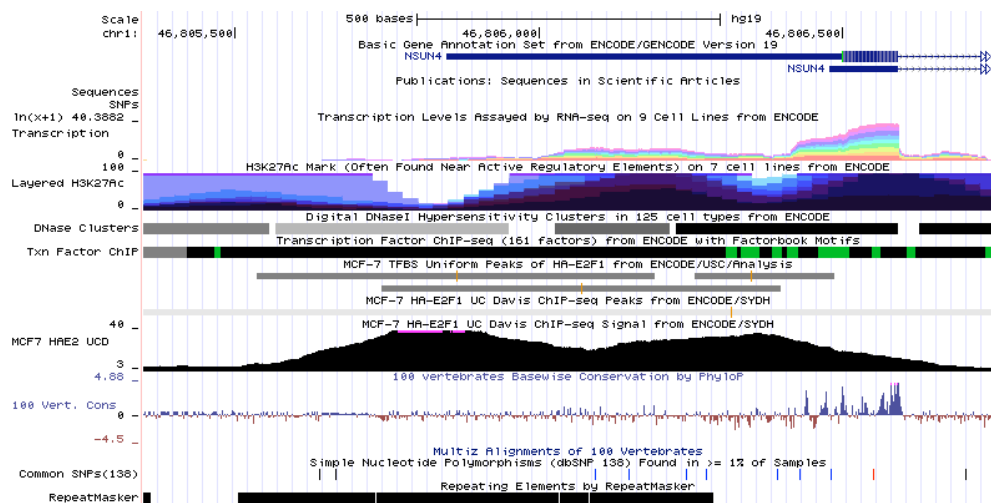

## TOMM40

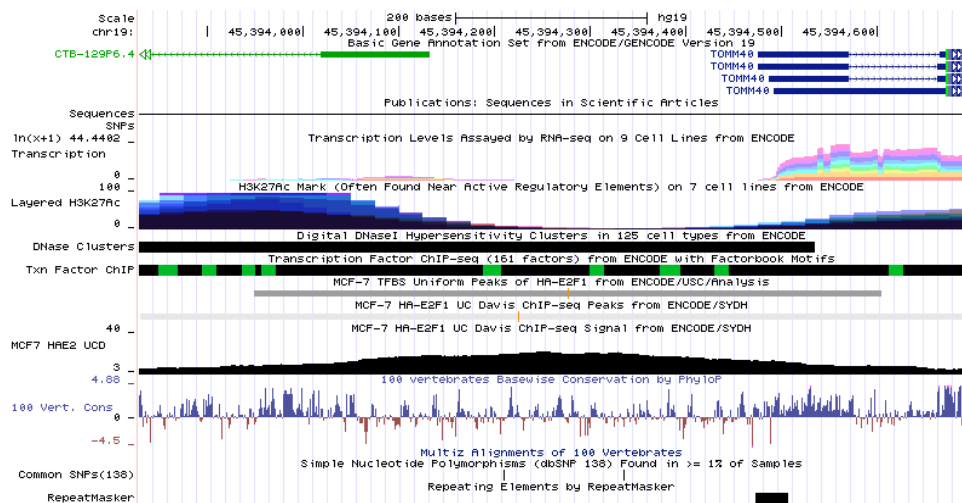

## PHB2

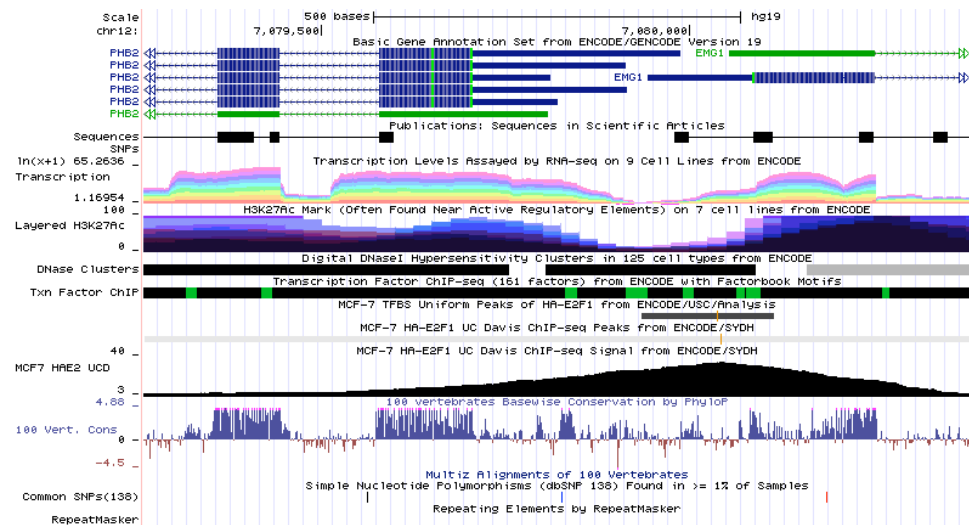

## ATP5D

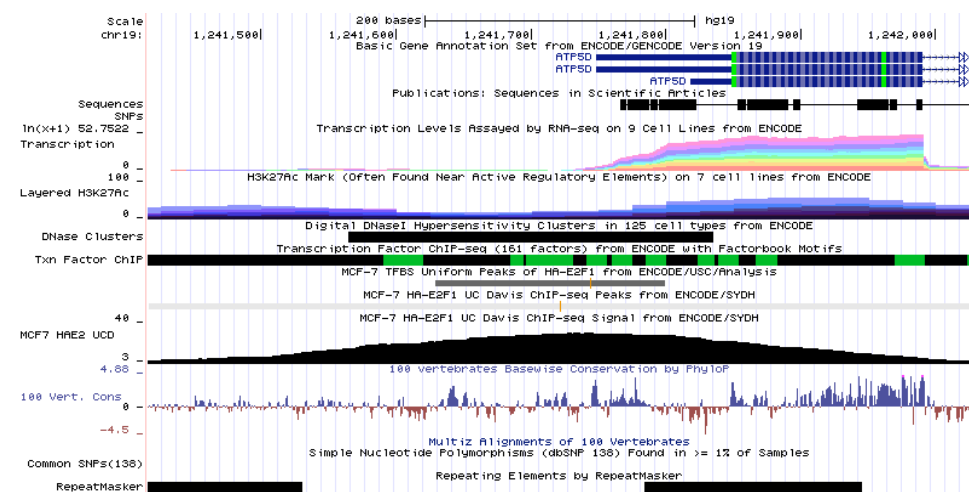

**Figure S6. Control of mitochondrial protein translation genes by RB and E2F1.** (A) A list of 26 MPT genes that are upregulated in Rb/p53-deficient vs. p53-deficient claudin-low like mammary tumors, and contain consensus E2F1 binding motif(s) in their promoters within -2kb to +1kb of the transcription starting site as deduced from oPOSSUM 3.0. Locations, scores and E2F sequences are indicated. (B) oPOSSUM analysis of E2F regulated DNA replication, GST transferase and TCA cycle genes. Note that E2F1 scored high only in the former pathway. (C) UCSC analysis of the MRPL37 gene depicting transcription, H3K27acetylation (Ac), DNA hypersensitive regions, E2F1 consensus binding sites and ChIP-seq data. (D) UCSC analysis of additional MPT genes (NSUN4, PHB2, TOMM40 and ATP5D) upregulated in Rb/p53 vs. p53 claudin-low like tumors and scored positive by ENCODE analysis of MCF7 cells. Note transcription from RNA-seq data, E2F1 consensus sites, DNase hypersensitive regions, ENCODE HA-E2F1 binding and H3K27acetylation mark suggesting active promoters.

**A**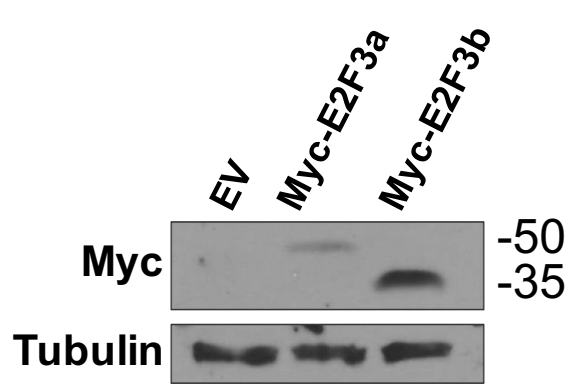**B**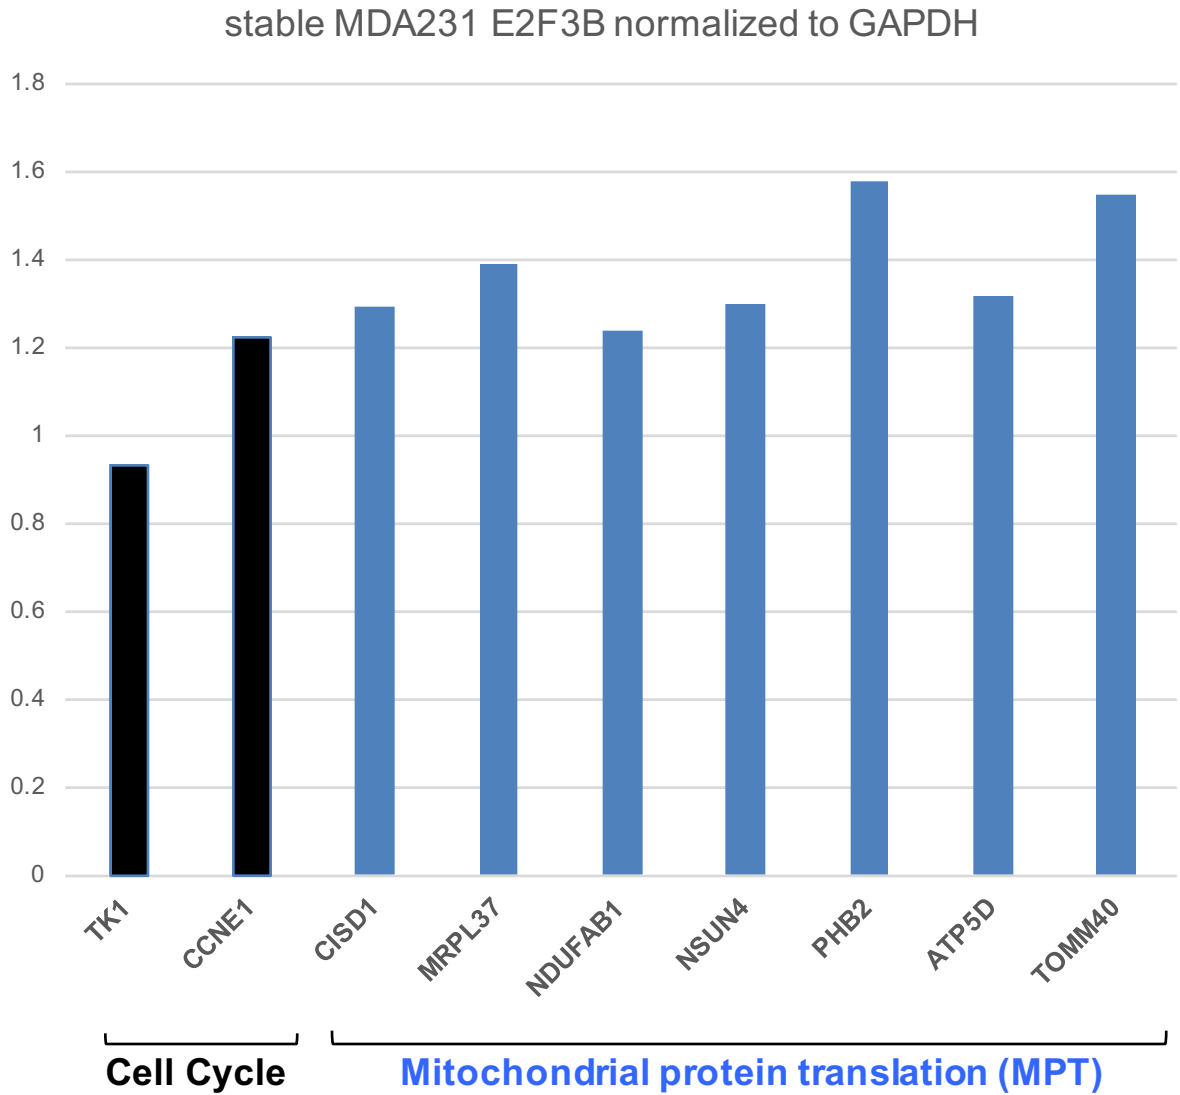

**Figure S7. Moderate induction of MPT and cell cycle genes in MDA-MB-231 cells stably expressing E2F3b.** (A) Immunoblot of MDA-MB-231 cells stably transduced by retroviruses encoding Myc-E2F3a and Myc-E2F3b, or empty vector (EV). Note very low expression of Myc-E2F3a, and robust expression of the shorter, Myc-E2F3b protein. (B) Q-rt-PCR of indicated MPT and known E2F regulated cell cycle genes normalized for GAPDH in Myc-E2F3b-expressing MDA-MB-231 cells.

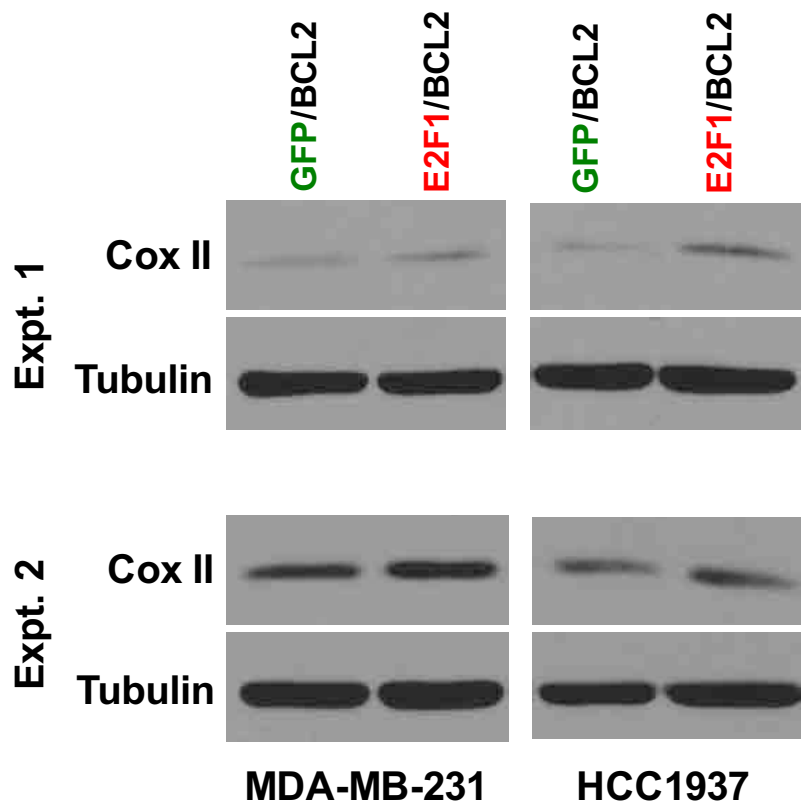

Supplemental Figure S8

**Figure S8. E2F1 induction of COX II protein expression in BC cells.** Two independent experiments showing the induction of the mitochondrially translated protein COX II in the indicated TNBC lines transduced by adenovirus vectors encoding E2F1 or GFP alone (control) together with Ad.Bcl-2.

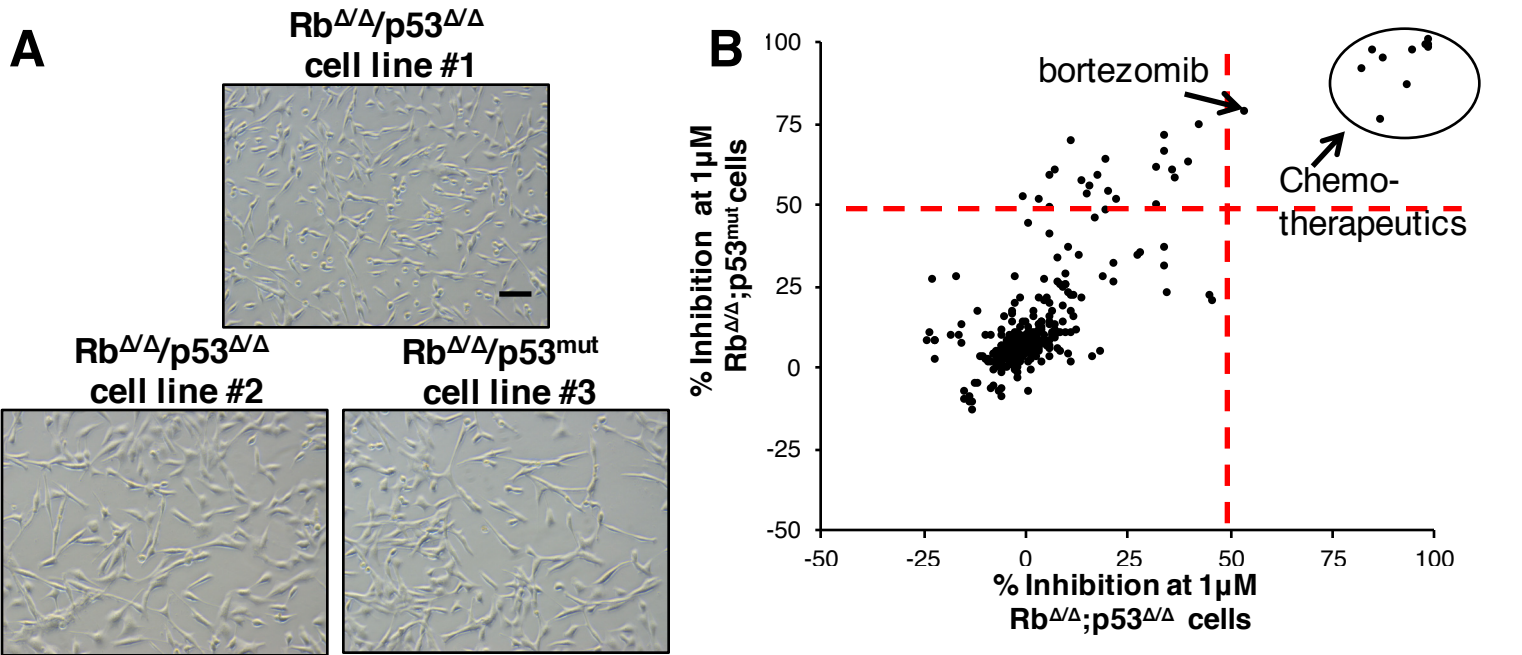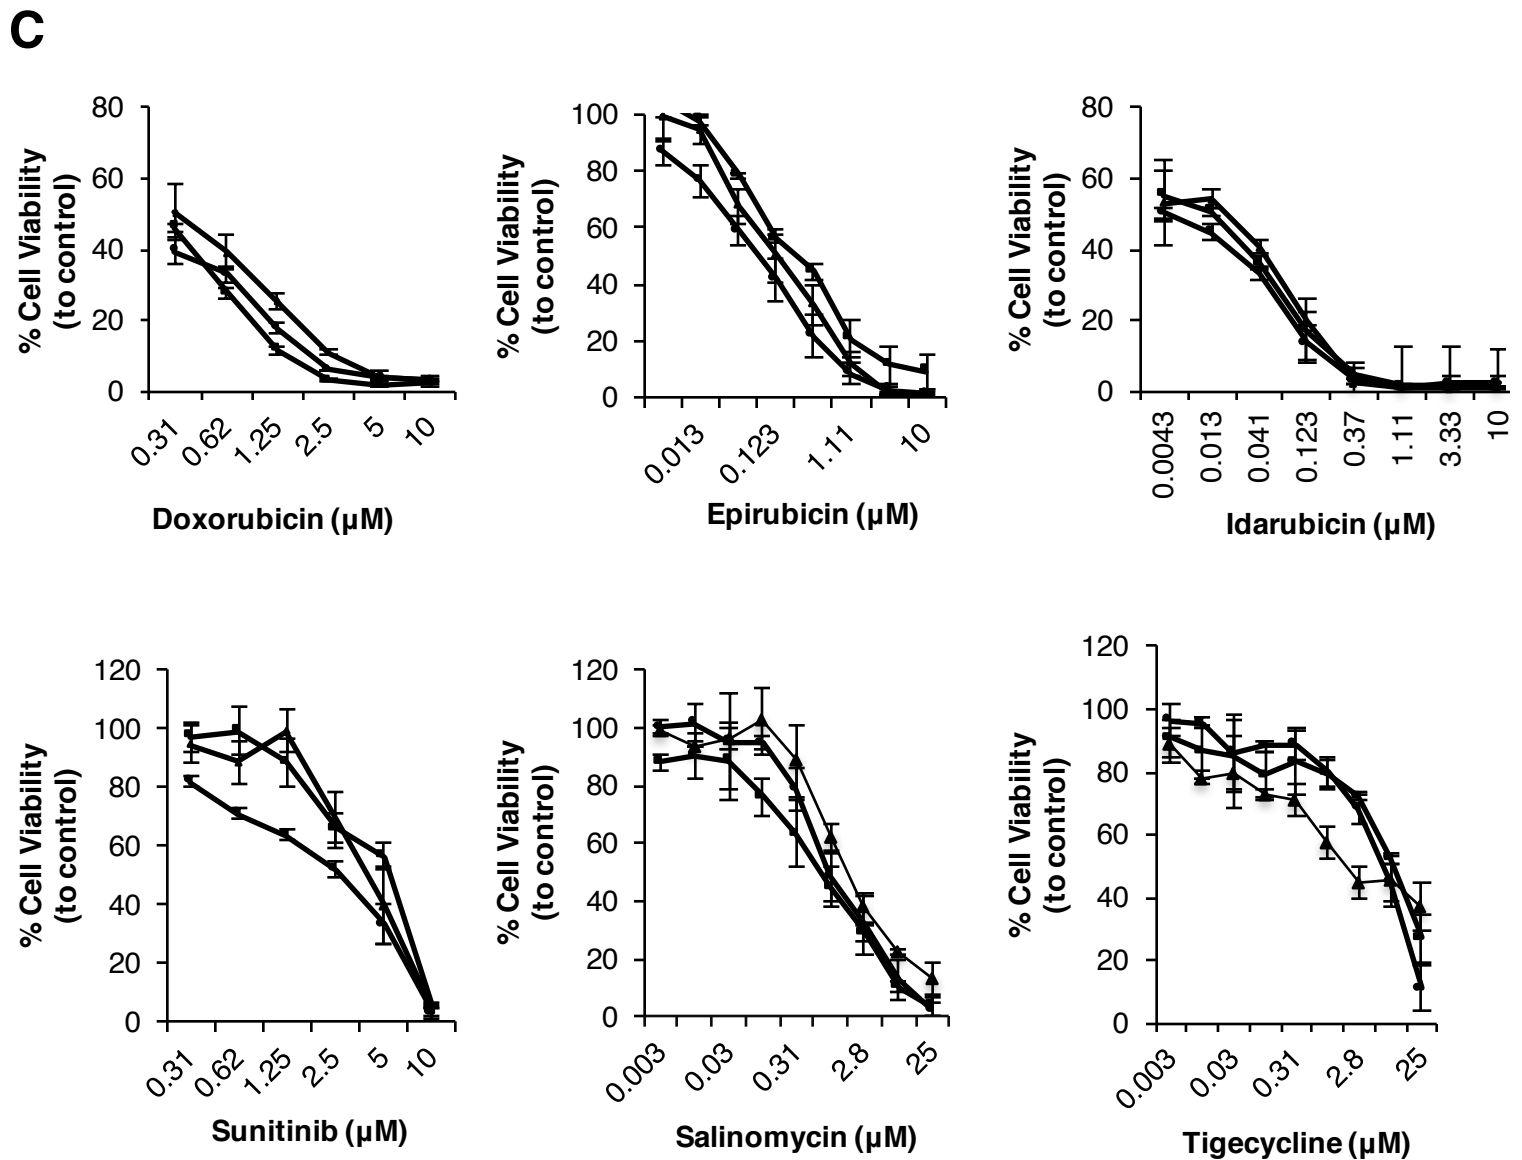

Supplemental Figure S9A-C



**Figure S9. High-throughput screen of FDA-approved drugs identifies potential therapeutic for claudin-low TNBC.** (A) Photomicrographs of primary mammary tumor cell lines isolated from Rb/p53-deficient (Rb<sup>ΔΔ</sup>;p53<sup>ΔΔ</sup>; cell lines #1-2) or Rb deficient/p53 mutant (Rb<sup>ΔΔ</sup>;p53<sup>mut/+</sup>; cell line #3) tumors. Scale bars, 200μm. (B) Scatter plot of high-throughput screening data showing % inhibition of cell viability following treatment with compounds from the FDA-approved library at 1μM. (C) Validation of drugs identified in the 10μM FDA-approved drug screen (Fig. 8C). Effects of doxorubicin, epirubicin, idarubicin, sunitinib, salinomycin and tigecycline on Rb/p53-deficient ( #1 (●) and #2 (■)) and Rb-deficient/p53 mutant (#3, ▲) primary mammary tumor cells lines.

**A**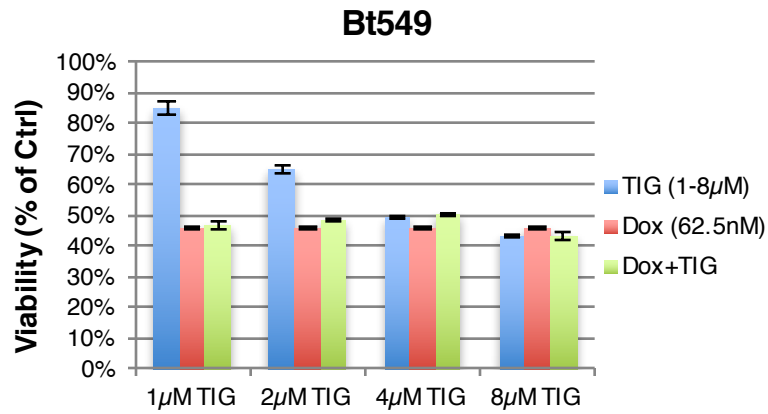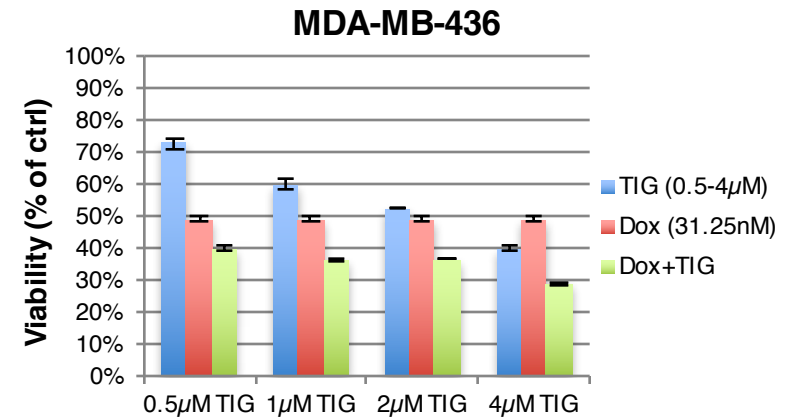**B**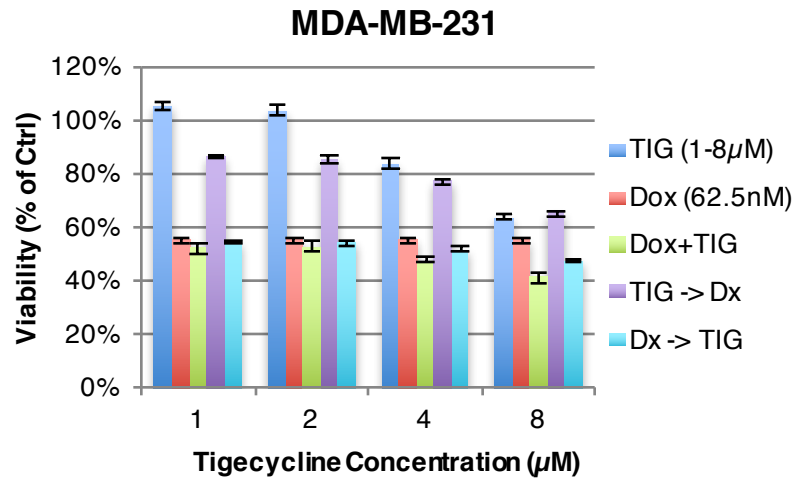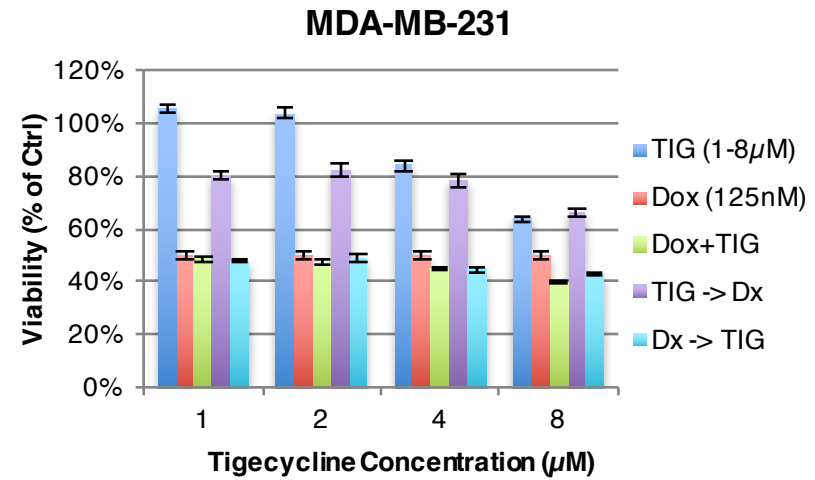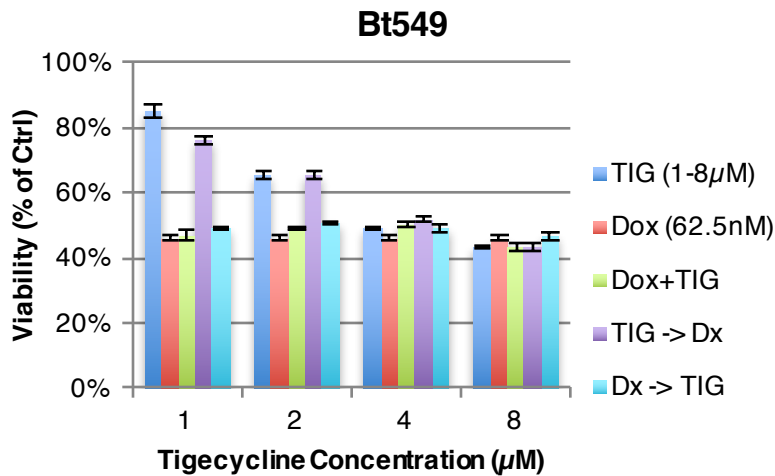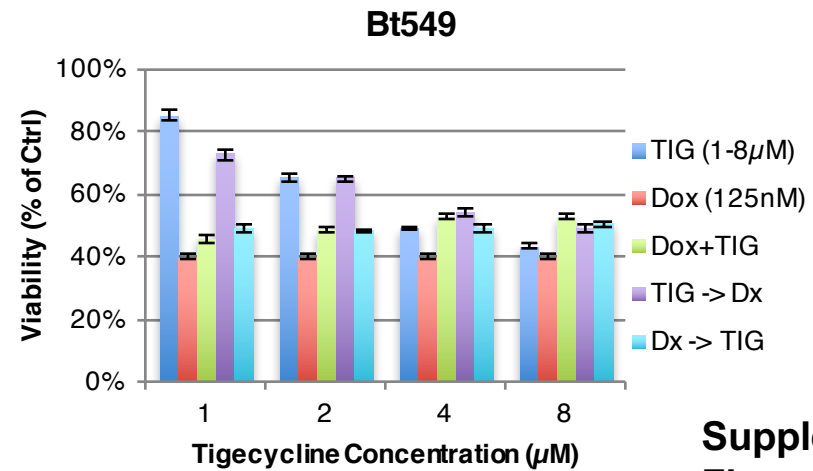

**C**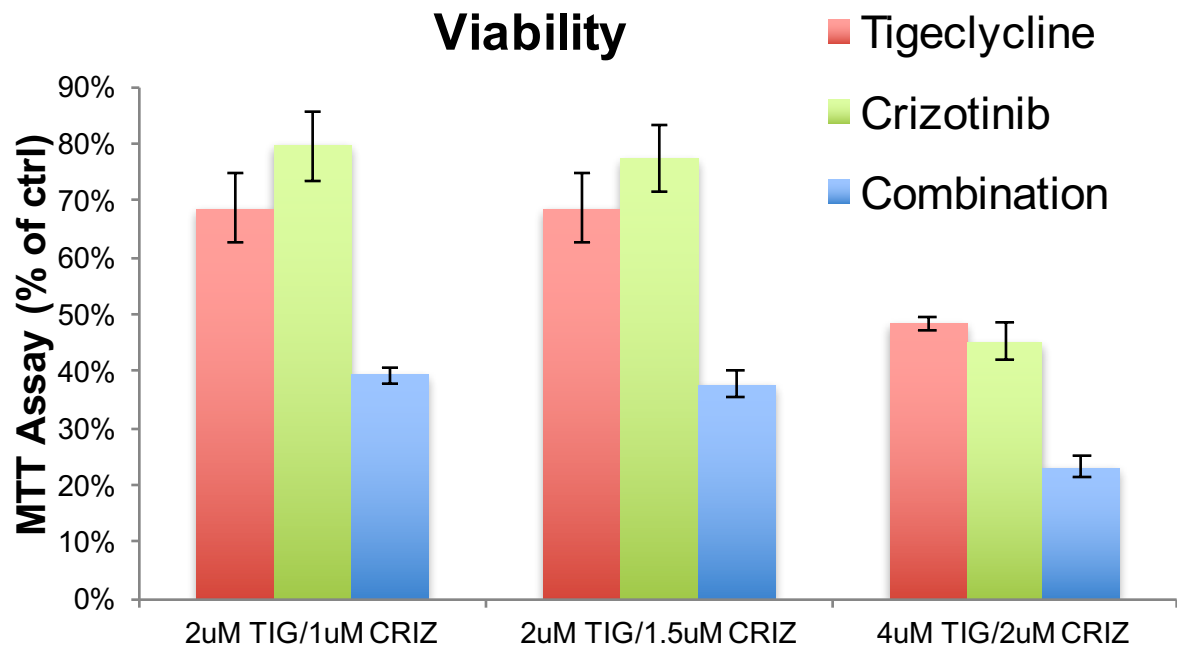**D**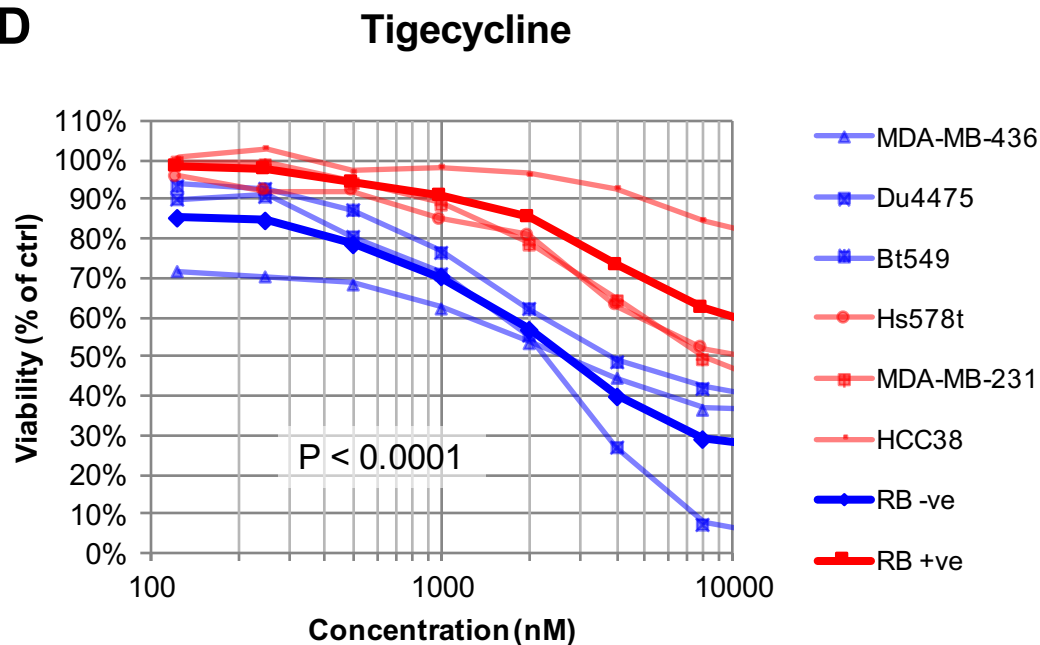RB - vs RB +,  $p < 0.0001$ **E**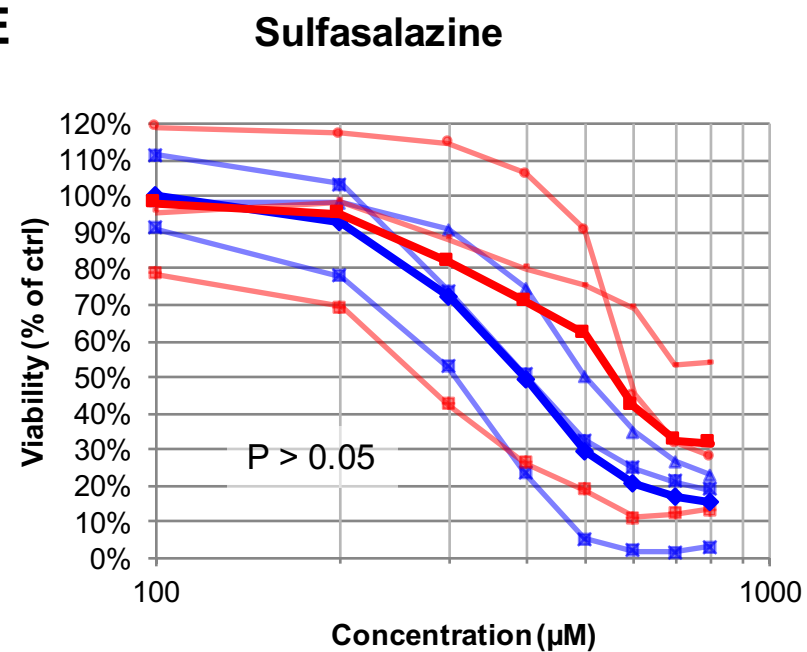RB - vs RB +,  $p = 0.1888$ **Supplemental Figure S10C-E**

**Figure S10. Effect of order-of-addition of TIG plus doxorubicin or SSZ on growth of TNBC cells.**

(A) MDA-MB-231 and Bt549 cells treated with tigecycline and doxorubicin alone or in combination were analyzed by MTT assays showing minimal cooperation between tigecycline and doxorubicin. (B) Effect of order-of-addition of tigecycline and/or doxorubicin on indicated TNBC lines. (C) Cooperative effect of TIG and the MET inhibitor crizotinib in BT549 TNBC cells. (D-E) TIG vs. SSZ treatment of indicated TNBC lines. Note that as opposed to TIG (Fig. 8D shown here for comparison), SSZ has insignificantly differential effects on growth of RB<sup>+</sup>/p53<sup>-</sup> vs RB<sup>-</sup>/p53<sup>-</sup> TNBC.

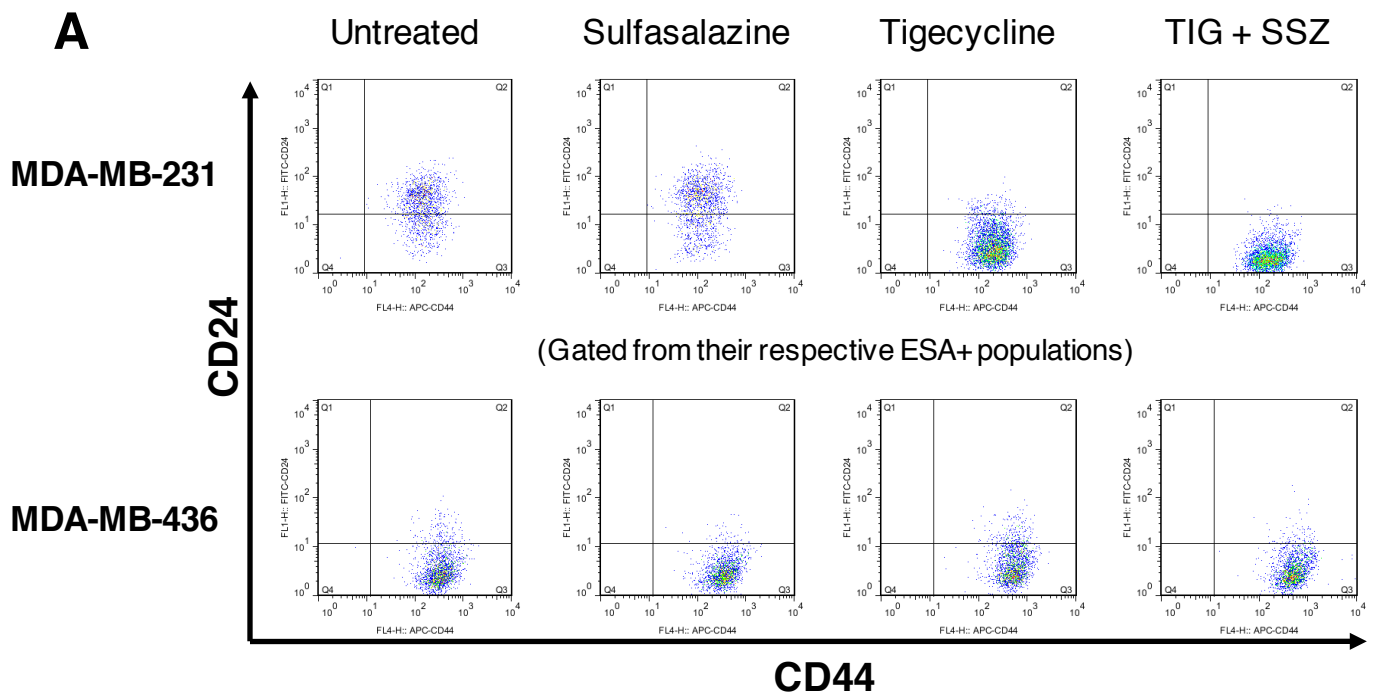

**B**

**CSC Relative Ratio**

|                  | Untreated | SSZ  | TIG  | T+S  |
|------------------|-----------|------|------|------|
| MDA-MB-231(RB+)  | 1.00      | 0.88 | 2.88 | 2.82 |
| MDA-MB-436 (RB-) | 1.00      | 1.14 | 1.05 | 1.09 |
| HCC38 (RB+)      | 1.00      | n/a  | 1.82 | n/a  |
| HCC1937 (RB-)    | 1.00      | n/a  | 0.69 | n/a  |

**Supplemental Figure S11**

**Figure S11. TIG treatment increases the CSC fraction in RB<sup>+</sup> but not RB<sup>-</sup> TNBC cells. (A)** Representative flow cytometry analysis for the CD24<sup>-</sup>:CD44<sup>+</sup>:ESA<sup>+</sup> CSC fraction in the RB<sup>+</sup>/p53<sup>-</sup> MDA-MB-231 vs. RB<sup>-</sup>/p53<sup>-</sup> MDA-MB-436 TNBC lines after TIG +/- SSZ treatments. Shown are the CD24 and CD44 profile after gating on the ESA<sup>+</sup> cells. Note the increase in the CSC population after TIG treatment in RB<sup>+</sup> MDA-MB-231 cells. **(B)** Summary of the effects of TIG on the CSC fraction in two RB<sup>+</sup>/p53<sup>-</sup> vs RB<sup>-</sup>/p53<sup>-</sup> TNBC lines using IC<sub>50</sub> drug concentrations.

**MDA-MB-436**

Xenografts in NSG (36 days treatment)

**Untreated**

**TIG x 2**

**TIG + SSZ**

**H&E**

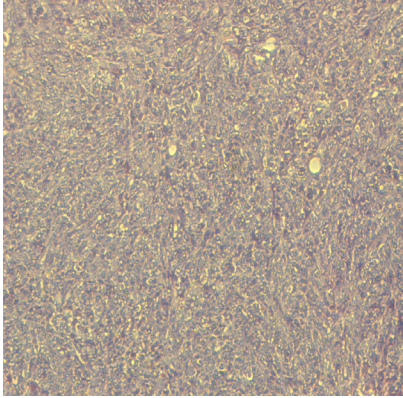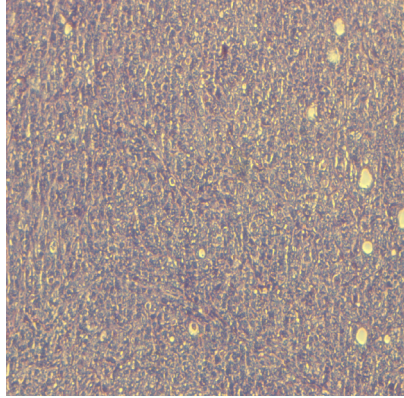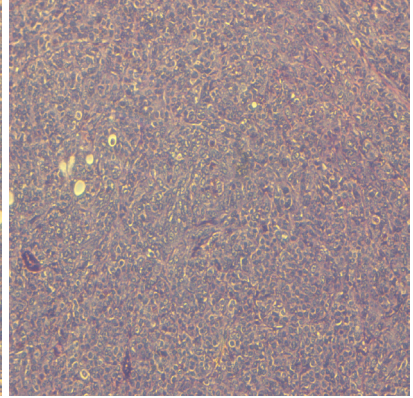

**PH3**

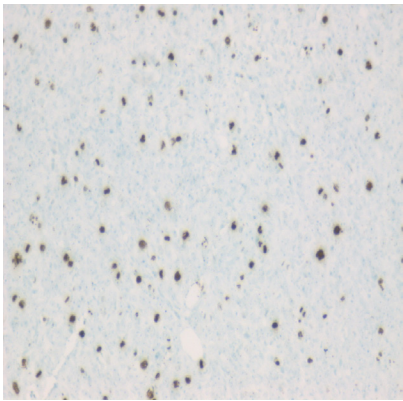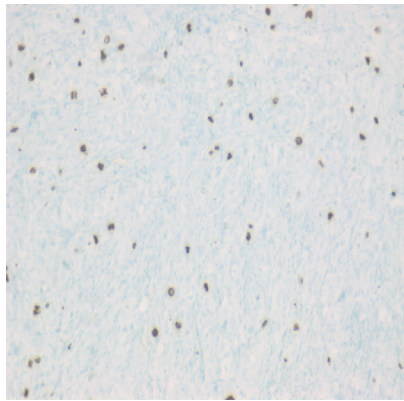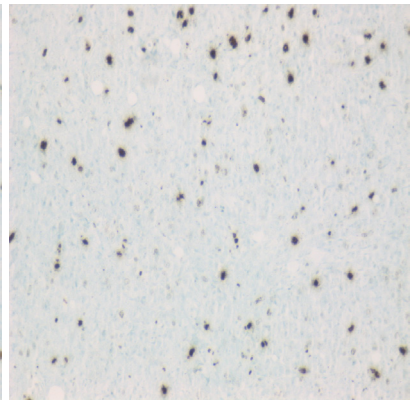

**Supplemental Figure S12**

**Figure S12. Representative histology (A) and staining for the mitotic marker phospho-H3 (B) of sections from MDA-MB-436 xenografts treated or not with double dose of TIG or TIG + SSZ for 36 days.** At day 36, T+S Ctrl n=4, T+S treatment n=4, TIGx2 ctrl n=4, TIGx2 treatment n=5. For each tumor 6 slides were analyzed. Note the reduced PH3 positive cells following TIG treatment. See quantification in Fig. 10F-G.



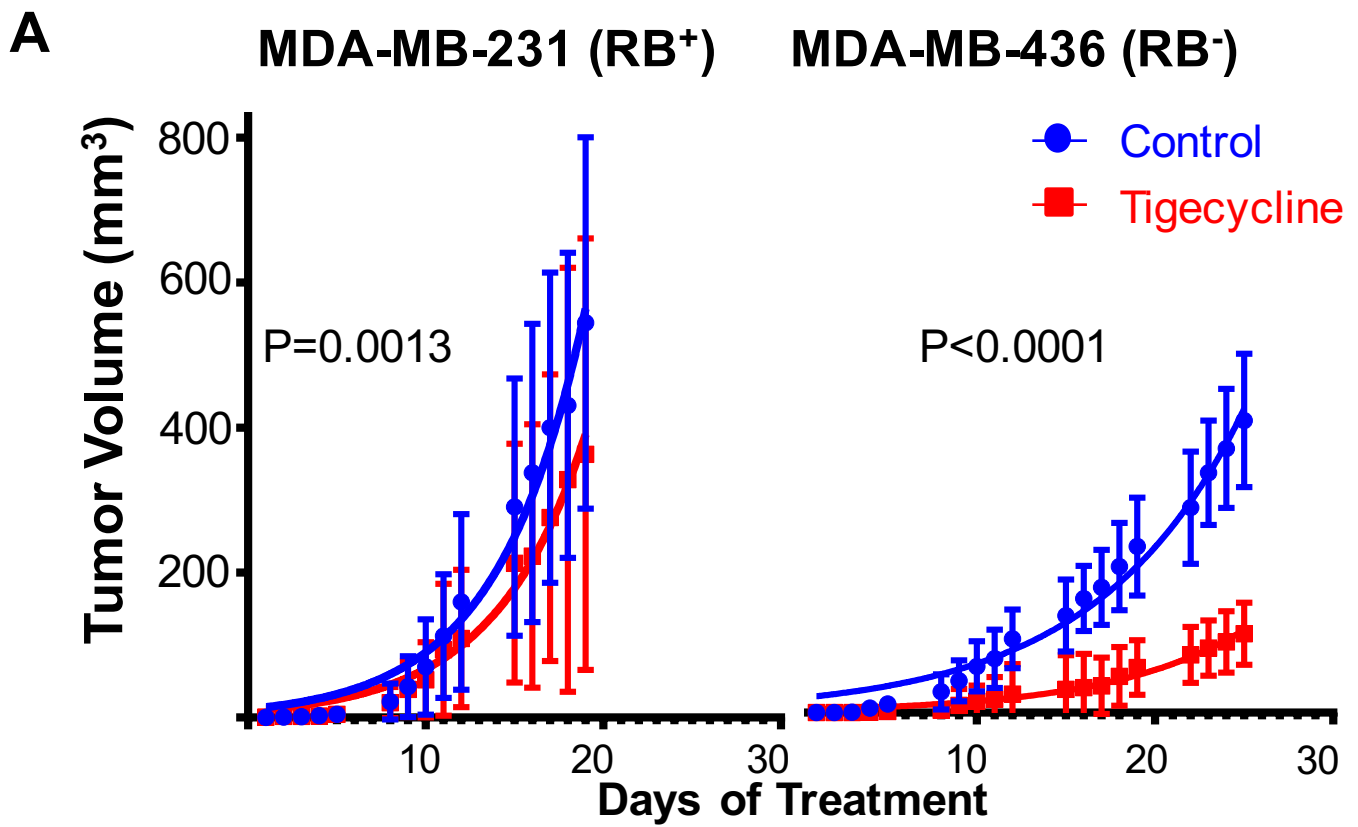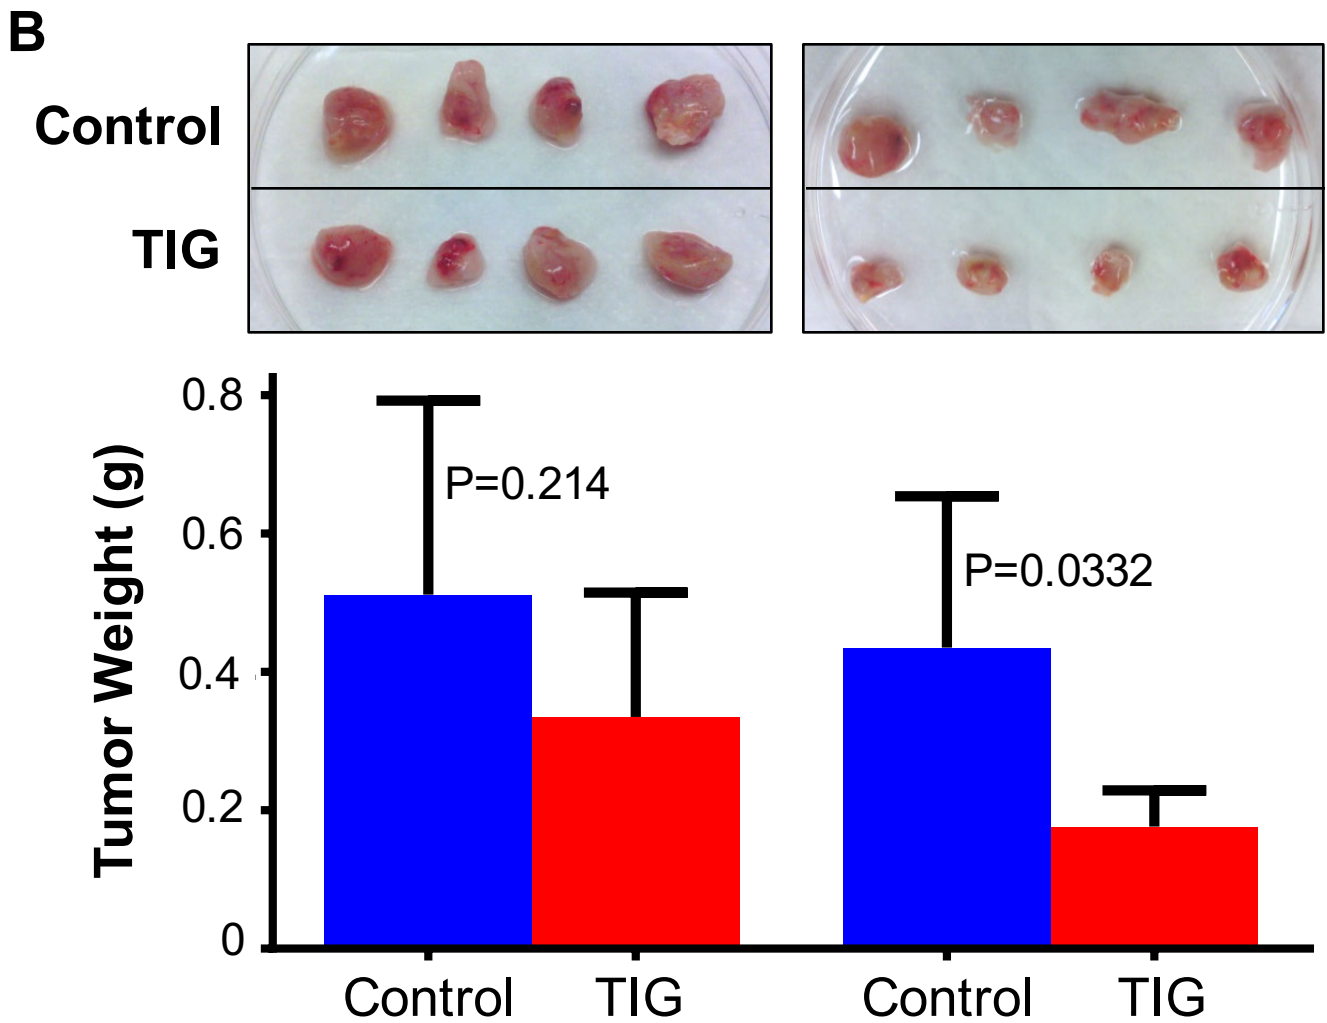

Supplemental Fig. S13

**Figure S13. Efficient suppression of RB<sup>-</sup>/p53<sup>-</sup> but not RB<sup>+</sup>/p53<sup>-</sup> TNBC xenograft growth by tigecycline.** (A) NSG mice were injected with  $1 \times 10^6$  MDA-MB-436 (RB<sup>-</sup>/p53<sup>-</sup>) or MDA-MB-231 (RB<sup>+</sup>/p53<sup>-</sup>) cells into their inguinal (#4) mammary gland. Once palpable tumors formed mice were treated with tigecycline (50mg/kg) (n=8) or PBS (Control) (n=6) twice daily. Tumor diameter was measured 5 days/week. p-values were calculated using the Wilcoxon method. (B) Tumors were excised, photographed and weighed. P values by student t-test.

**MPT genes**

|          |         |                         |
|----------|---------|-------------------------|
| hATP5D   | forward | TGGTCGTGGTGCATGCAG      |
|          | reverse | CAACATGTCCAGCGTCACG     |
| hTOMM40  | forward | GAGTTTGAGGCCAGCACAAG    |
|          | reverse | ACCCACGATCCAGTTGCTAT    |
| hCISD1   | forward | TACTGCCGTTGTTGGAGGTC    |
|          | reverse | ATCAGAGGGCCACATTGTC     |
| hDHFR    | forward | AGCAGAGAACTCAAGGAACCT   |
|          | reverse | GCCACCAACTATCCAGACCA    |
| hMRLP37  | forward | TGGACTGTAACGAGGGTGTC    |
|          | reverse | TGTCTCTGGCTTGAAACCAAC   |
| hNDUFAB1 | forward | CAGCCGGCCTTAGTGCTC      |
|          | reverse | GGTCCTGGATGCCCTCTAAC    |
| hNSUN4   | forward | CAGGGATGGAAATCAAGTTCGA  |
|          | reverse | ATGAAGGGAGTGGCGGTC      |
| hPHB2    | forward | CTATGACATTCGGGCCAGAC    |
|          | reverse | CATTGGGTCGAGACAACAACCTC |

**Known E2F1 regulated genes**

|            |         |                         |
|------------|---------|-------------------------|
| hPOLalpha1 | forward | GAAGTTCAAGTCTAAGCCAGTGG |
|            | reverse | AGGCTAGATGTGTTGGTCCC    |
| hTK1       | forward | ATGCCAAAGACACTCGCTAC    |
|            | reverse | TCGTCGATGCCTATGACAGC    |
| hCCNE1     | forward | CAAATCGACAGGACGGCG      |
|            | reverse | CTTGACGTTGAGTTTGGGT     |
| hBBC3      | Forward | GATGGCGGACGACCTCAAC     |
|            | Reverse | TGATGAGATTGTACAGGACCCTC |

**others**

|        |         |                       |
|--------|---------|-----------------------|
| hGAPDH | forward | TGGAAGGACTCATGACCACAG |
|        | reverse | ATGATGTTCTGGAGAGCCCC  |

**Figure S14. Q-rt-PCR primers used in this study for MPT, cell cycle, apoptosis and other genes.**
